# Supplementary material
Source: PubMed Central journal article supplement (PMC2947297)
Supplement: mmc1.pdf [file mmc1.pdf]

**Supplemental Table 1: Clinical characteristics of patient cohort**

| <b>Characteristics</b>                    | <b>n (%) or mean (range)</b> |
|-------------------------------------------|------------------------------|
| All patients                              | 171                          |
| Receptor status                           |                              |
| ER+/PR+/Her2±                             | 135 (79%)                    |
| ER-/PR-/Her2+                             | 8 (5%)                       |
| ER-/PR-/Her2-                             | 28 (16%)                     |
| Tumor subtype                             |                              |
| Invasive ductal carcinoma                 | 136 (80%)                    |
| Lobular carcinoma                         | 23 (13%)                     |
| Mucinous carcinoma                        | 3 (2%)                       |
| Mixed                                     | 9 (5%)                       |
| Patients lost to follow-up                | 10                           |
| With recurrent cancer                     | 1                            |
| Patients included in prospective analyses | 161                          |
| Alive at last follow-up                   | 125 (78%)*                   |
| Death from cancer during study period     | 25 (15%)                     |
| Death from other causes                   | 11 (7%)                      |
| Time to relapse, mo                       | 28 (2-54)                    |
| Follow-up time, mo                        |                              |
| All patients, median                      | 52 (2-92)                    |
| Patients still alive                      | 54 (2-92)                    |
| Patients dead                             | 31 (3-78)                    |

\* percentage of patients in prospective analyses, excluding those lost to follow-up
