# Supplementary material
Source: PubMed Central journal article supplement (PMC2947297)
Supplement: mmc2.pdf [file mmc2.pdf]

**Supplemental Table 2: Clinical characteristics of patient cohort**

| Characteristics      | n   | Median Cdc7 (IQR) | p-value              |
|----------------------|-----|-------------------|----------------------|
| Grade                |     |                   |                      |
| 1                    | 21  | 1.9 (0.5-5.3)     | p<0.001 <sup>†</sup> |
| 2                    | 75  | 4.7 (1.8-9.0)     |                      |
| 3                    | 75  | 13.9 (8.6-21.8)   |                      |
| Lymph Node*          |     |                   |                      |
| Negative             | 91  | 7.4 (3.0-13.0)    | p=0.54 <sup>‡</sup>  |
| Positive             | 68  | 8.9 (2.0-16.7)    |                      |
| Subtype              |     |                   |                      |
| Luminal              | 135 | 5.2 (1.7-9.4)     | p<0.001 <sup>§</sup> |
| Her2                 | 8   | 19.6 (13.0-27.4)  |                      |
| Triple-negative      | 28  | 20.6 (12.1-29.8)  |                      |
| NPI*                 |     |                   |                      |
| <3.4                 | 29  | 1.7 (0.5-5.4)     | p<0.001 <sup>†</sup> |
| 3.4-5.4              | 90  | 8.7 (4.0-14.7)    |                      |
| >5.4                 | 40  | 11.8 (6.9-18.5)   |                      |
| Ploidy status        |     |                   |                      |
| Aneuploid            | 85  | 9.0 (4.0-14.5)    | p=0.019 <sup>‡</sup> |
| Diploid              | 81  | 6.5 (1.9-11.3)    |                      |
| Cell cycle phenotype |     |                   |                      |
| I                    | 30  | 1.0 (0.2-3.7)     | p<0.001 <sup>§</sup> |
| II                   | 41  | 4.1 (2.1-6.8)     |                      |
| III                  | 100 | 12.3 (8.6-20.6)   |                      |

\* Data not available for 12 patients

† Nonparametric Jonckheere-Terpstra test for trend in median Cdc7 expression across categories of the characteristic

‡ Mann-Whitney test to compare average Cdc7 expression between the two

§ Kruskal-Wallis Analysis of Variance test for variation between categories in average Cdc7 expression
