# Supplementary material
Source: PubMed Central journal article supplement (PMC2947297)

Supplemental Figure 1

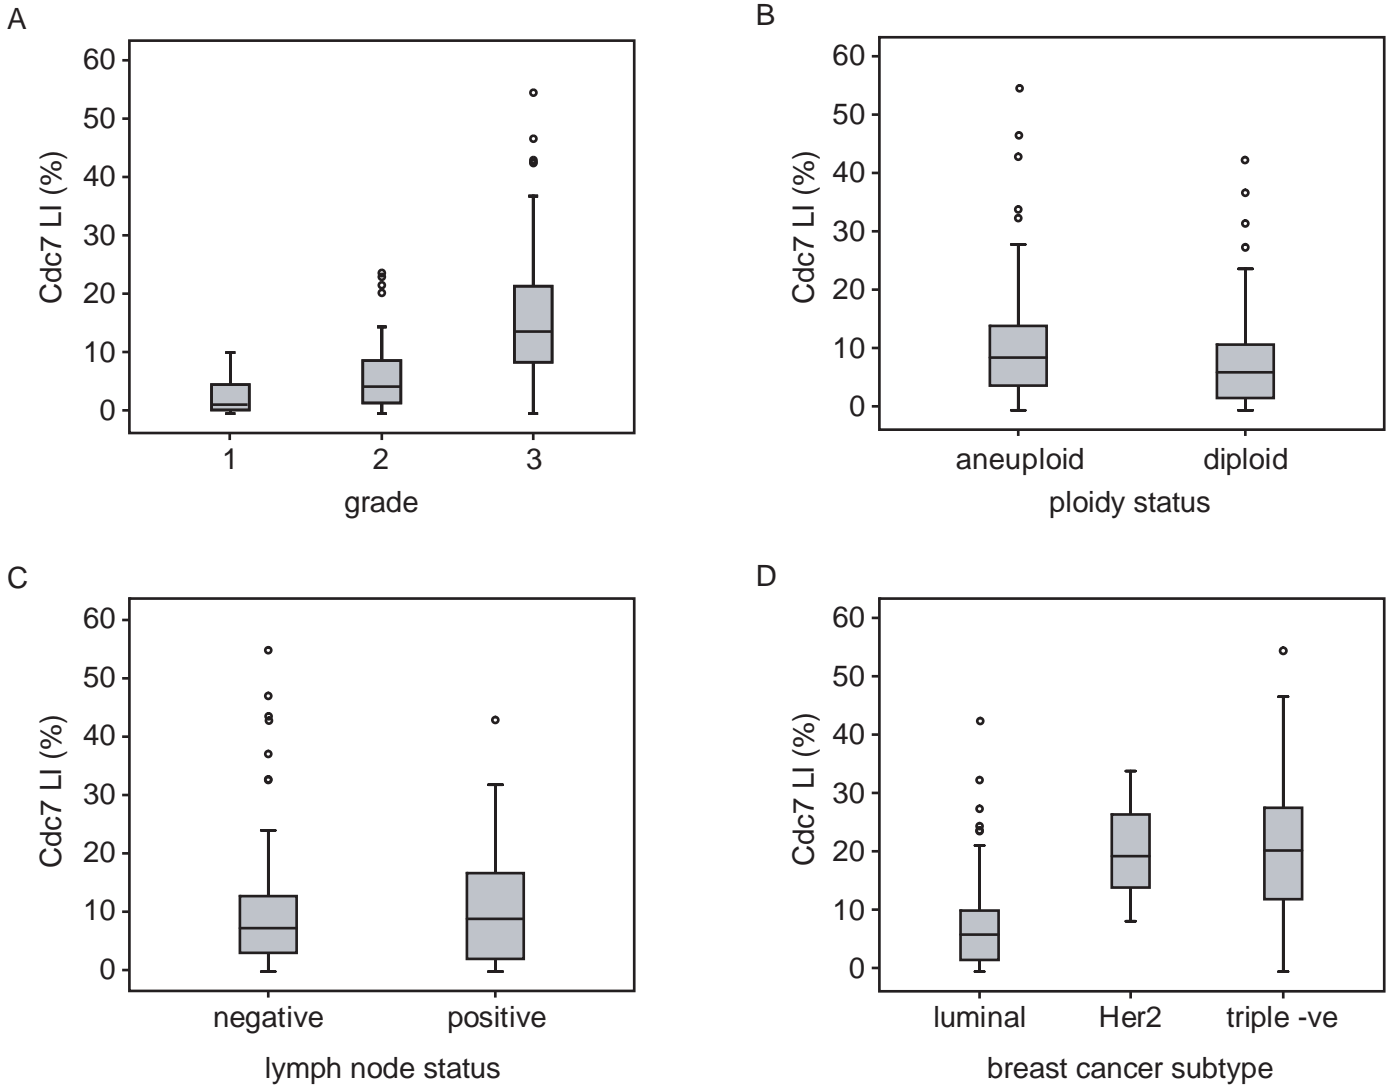

Supplement: mmc3.pdf [file mmc3.pdf]

Supplemental Figure 2

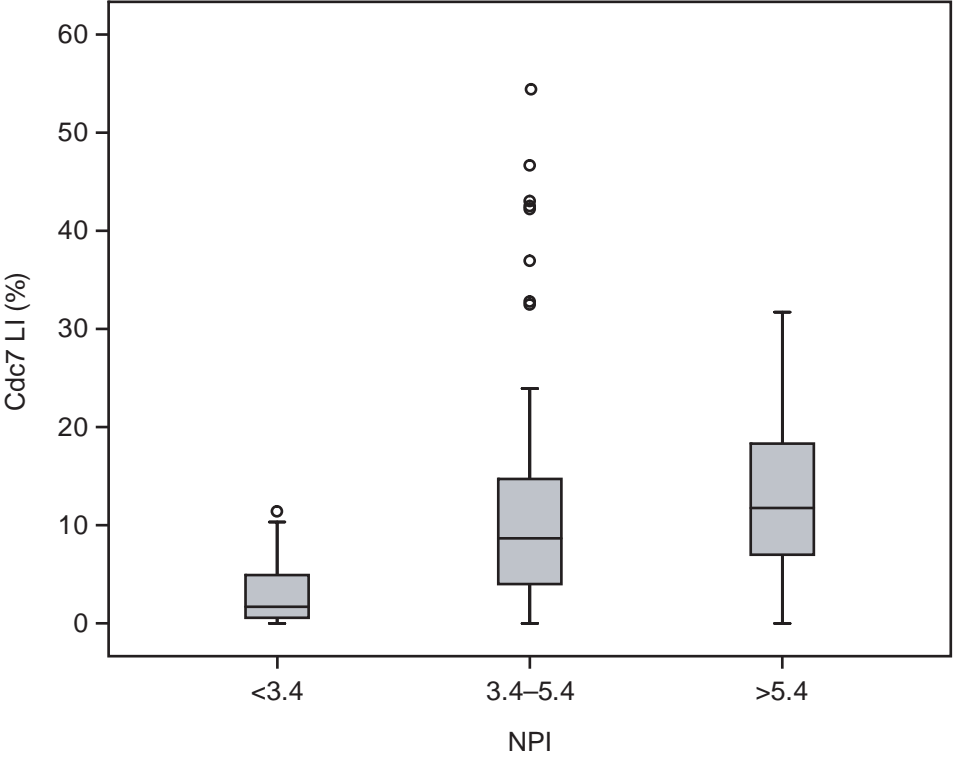

Supplement: mmc4.pdf [file mmc4.pdf]

Supplemental Figure 3

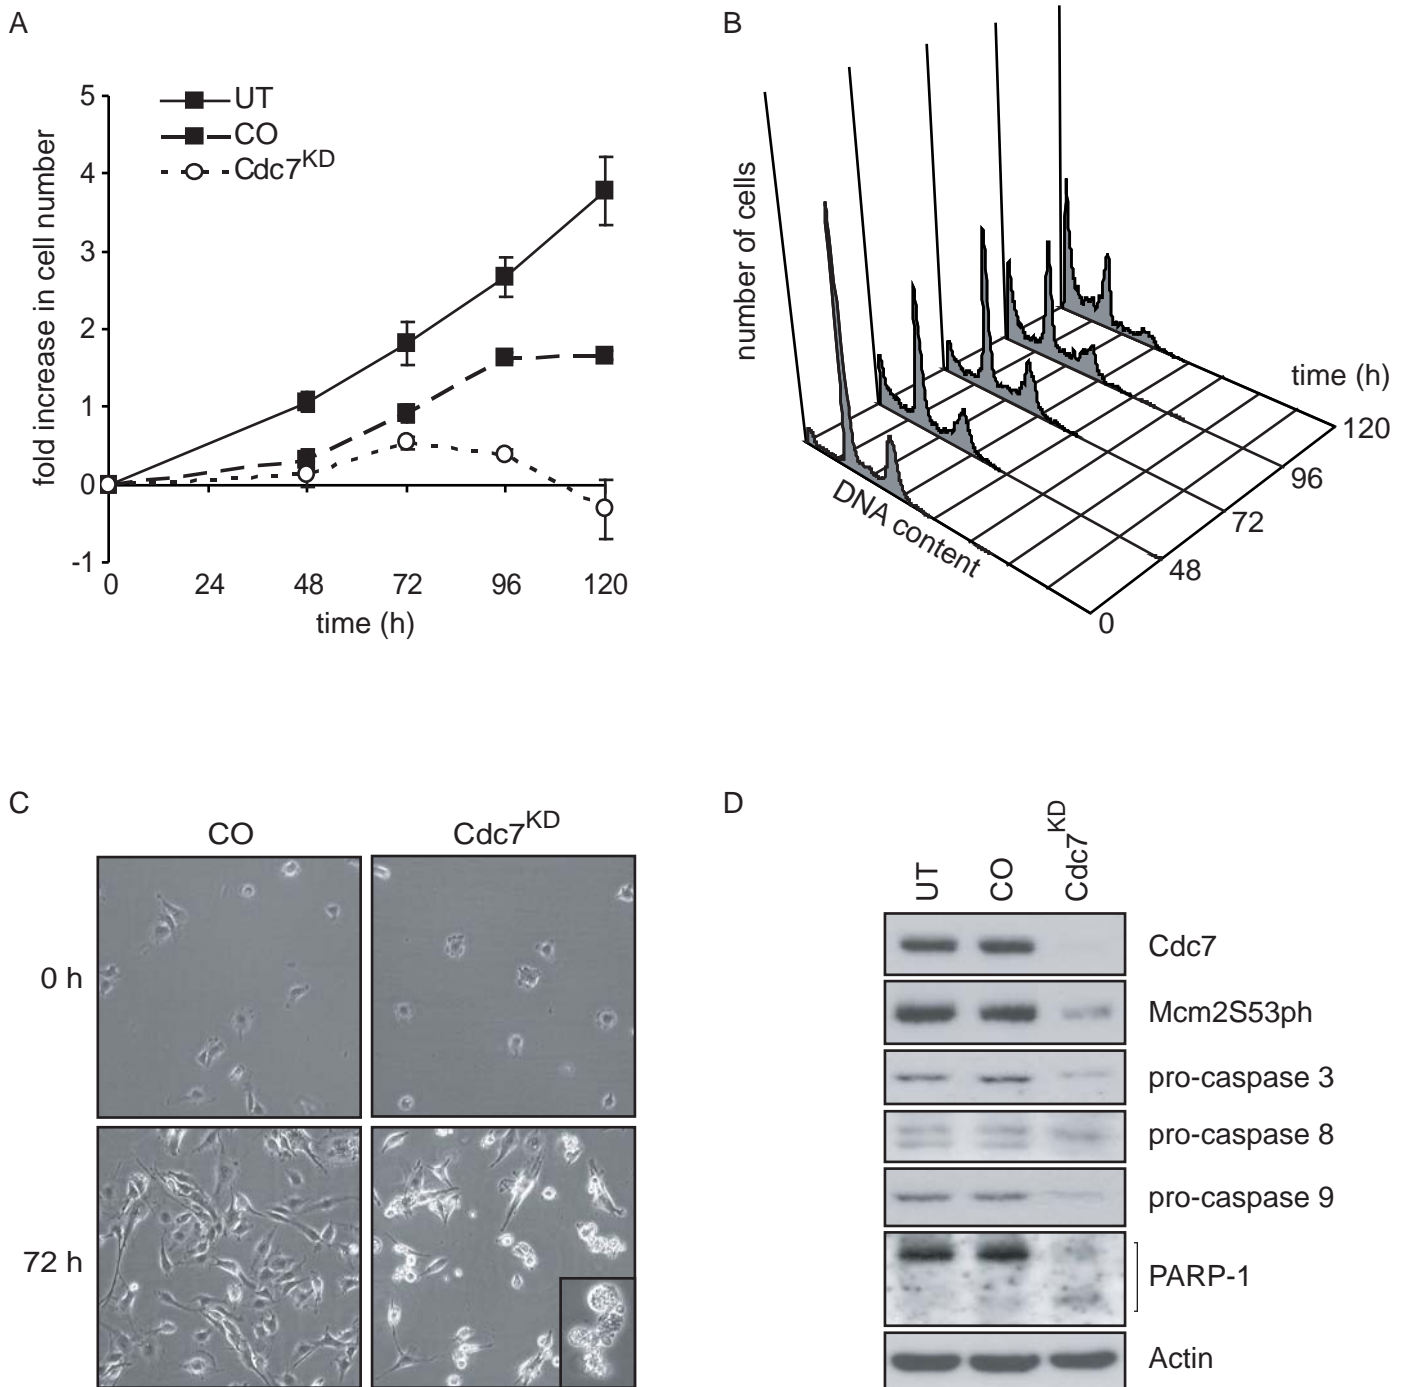

Supplement: mmc5.pdf [file mmc5.pdf]

Supplemental Figure 4

A

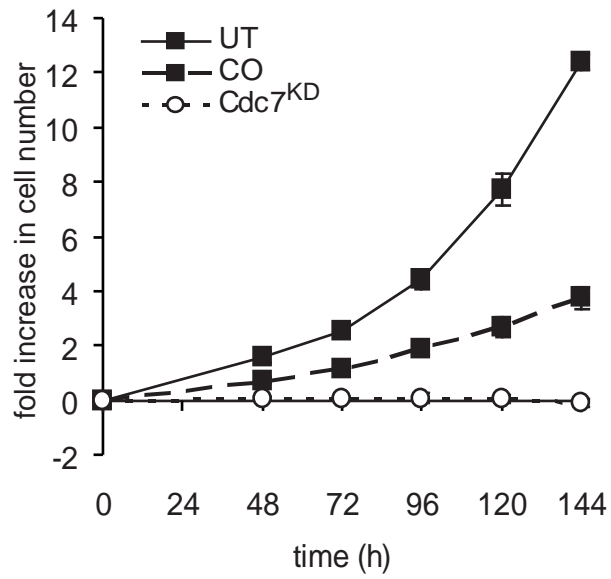

B

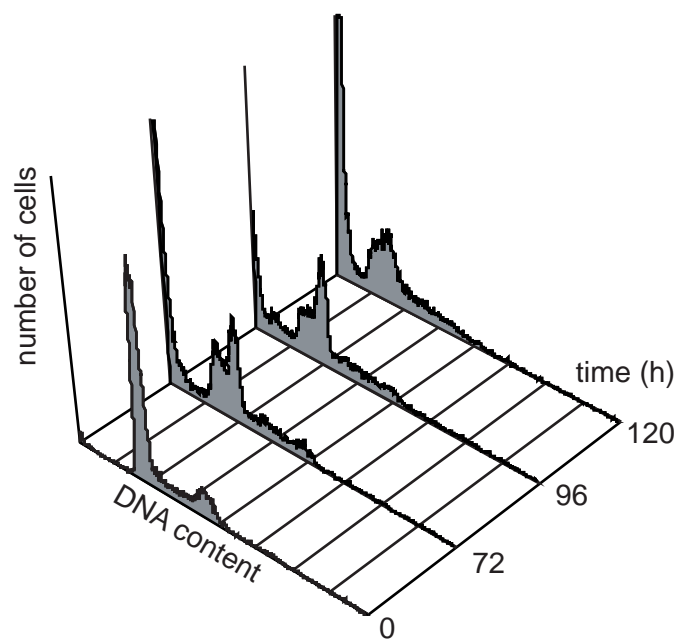

C

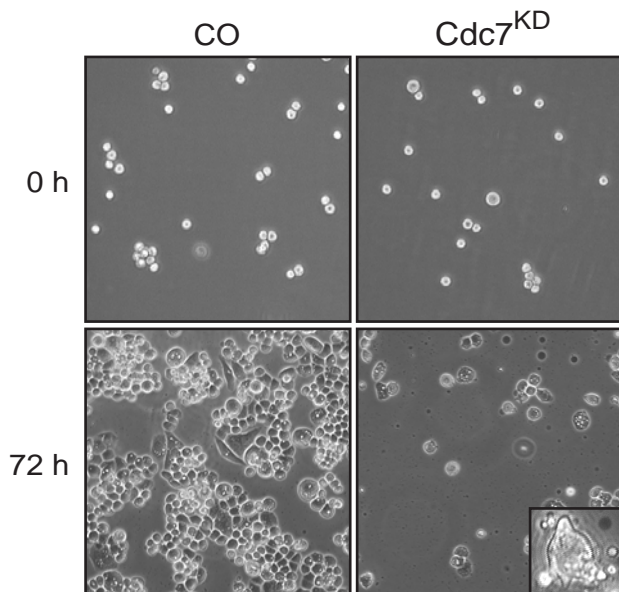

D

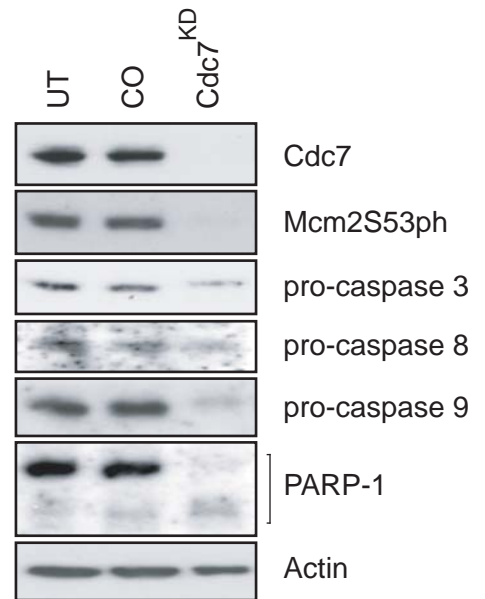

Supplement: mmc6.pdf [file mmc6.pdf]

Supplemental Figure 5

A

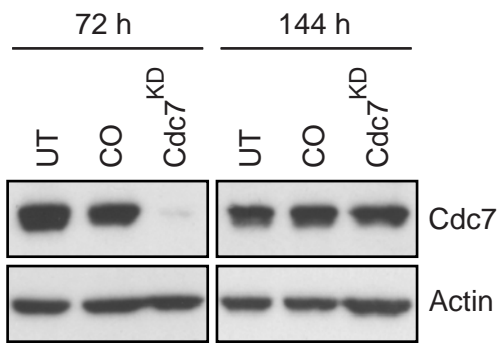

B

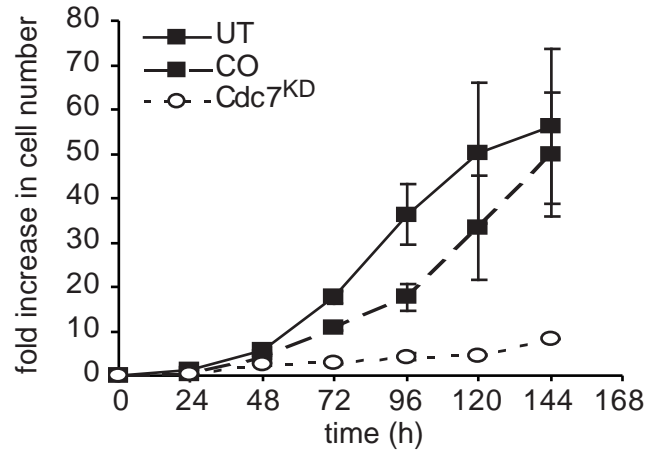

C

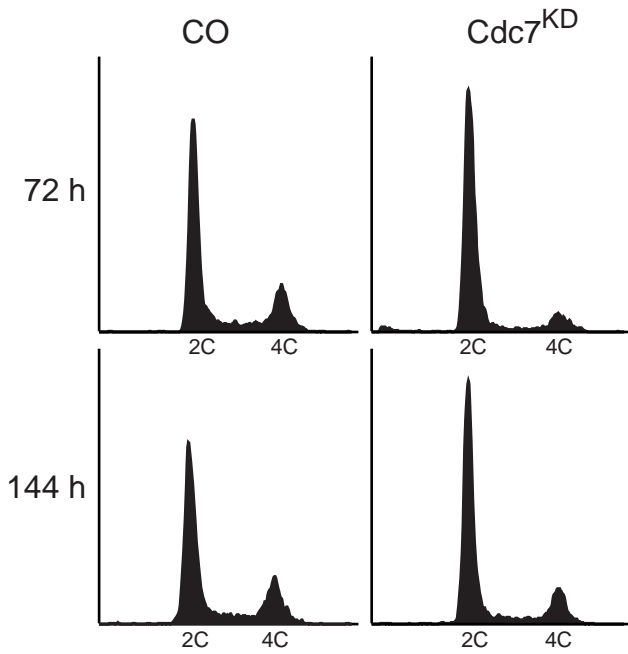

D

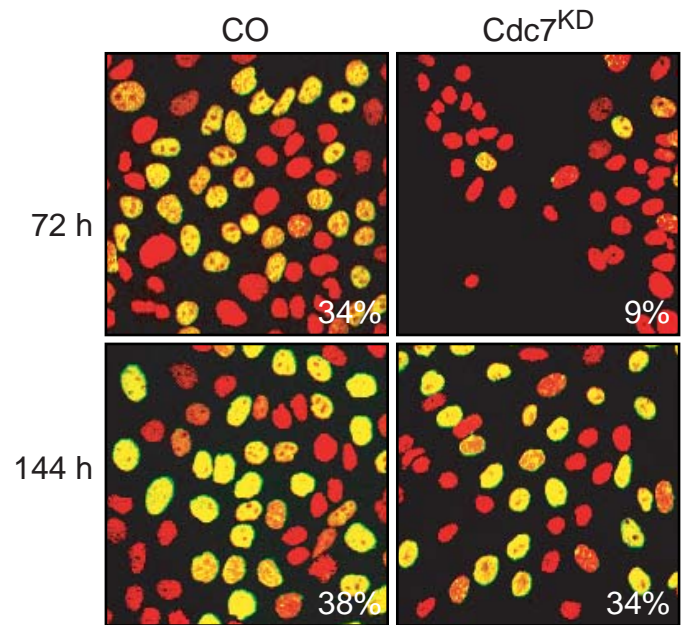

E

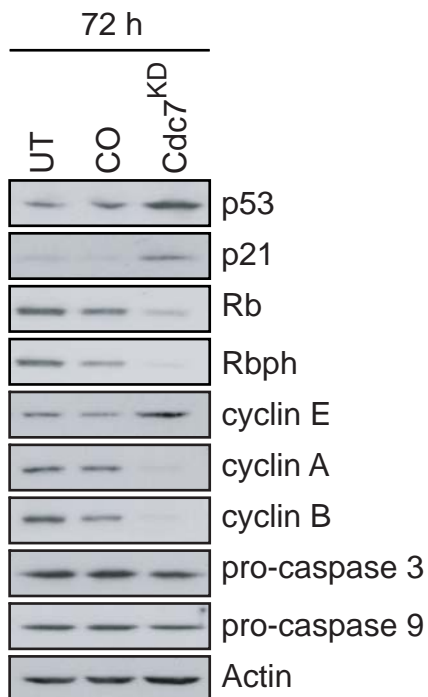

F

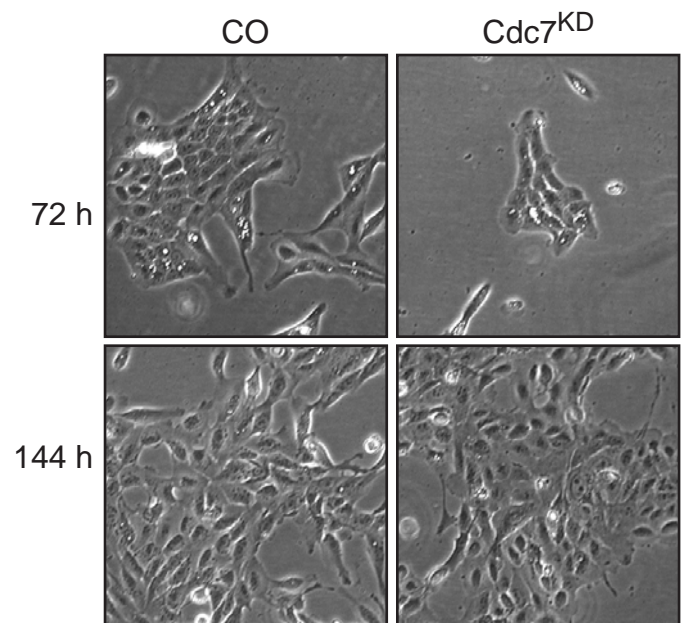

Supplement: mmc7.pdf [file mmc7.pdf]
